# Supplementary material for: Retention of HIV-Positive Adolescents in Care: A Quality Improvement Intervention in Mid-Western Uganda
Source: PubMed Central journal article supplement (PMC5960514; doi:10.1155/2018/1524016), 2018-05-06
Supplement: 1524016.f1.pdf [file 1524016.f1.pdf]

1

### Supplementary material

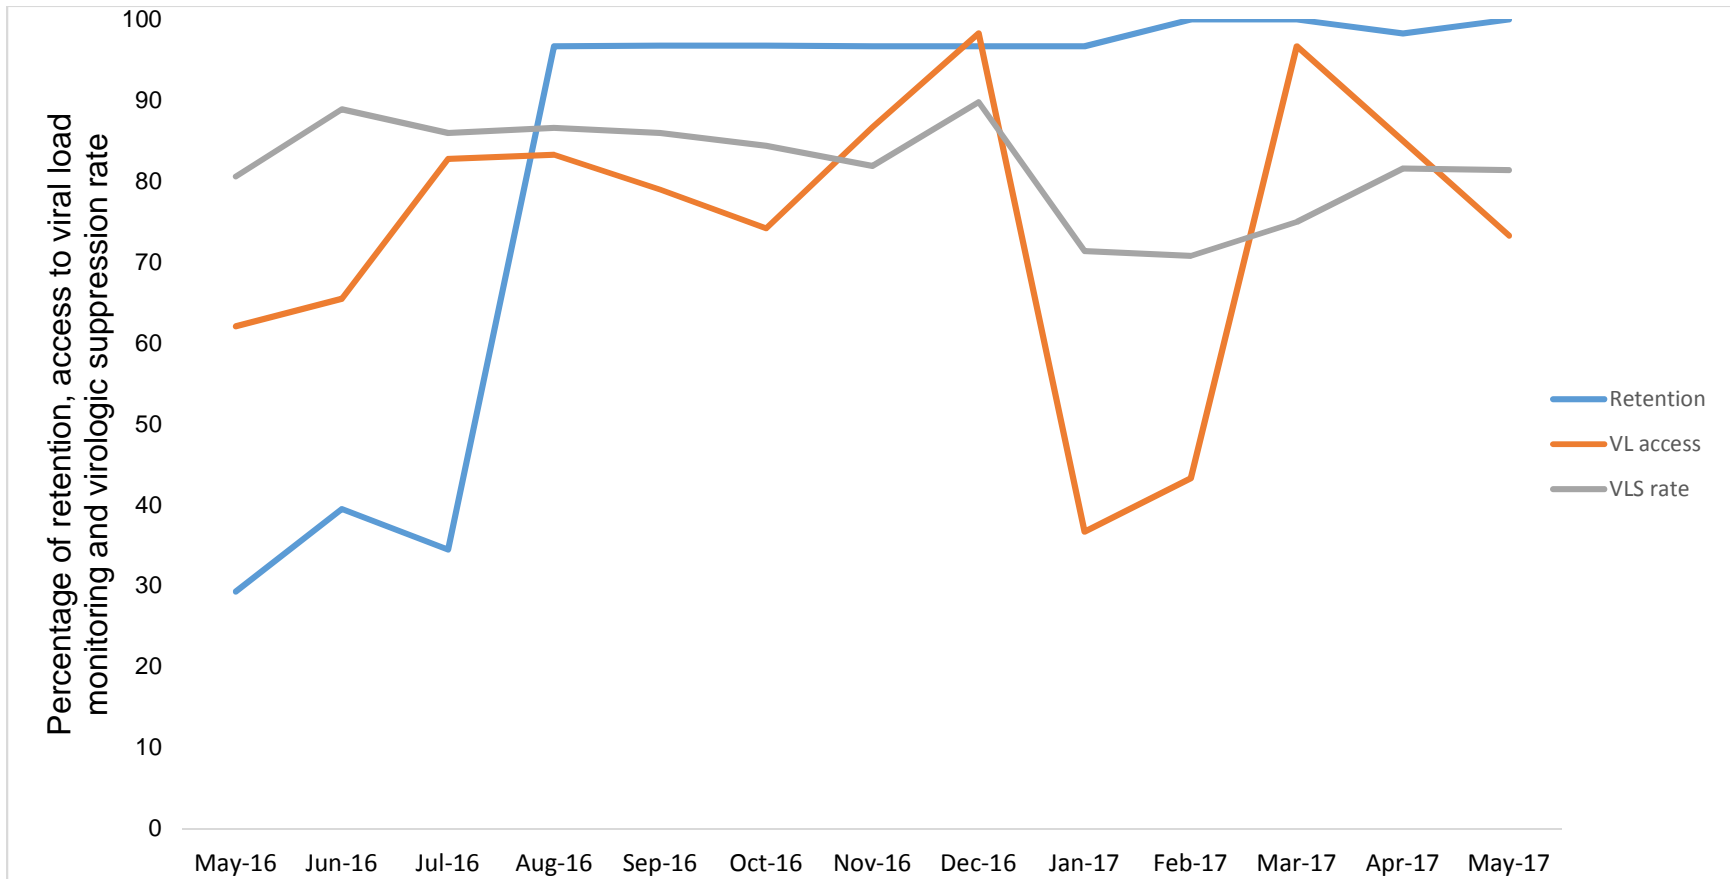

2

3

4 SUPPLEMENTARY MATERIAL S1: Viral load access and suppression levels versus retention

5 Note: VL: Viral load; VLS: Viral Load Suppression

6

7

8
